# Supplementary material
Source: Springer Nature journal article supplement (https://springermedizin.de/resource/supplementary/12984_2011_326_MOESM5_ESM.pdf/9605790)

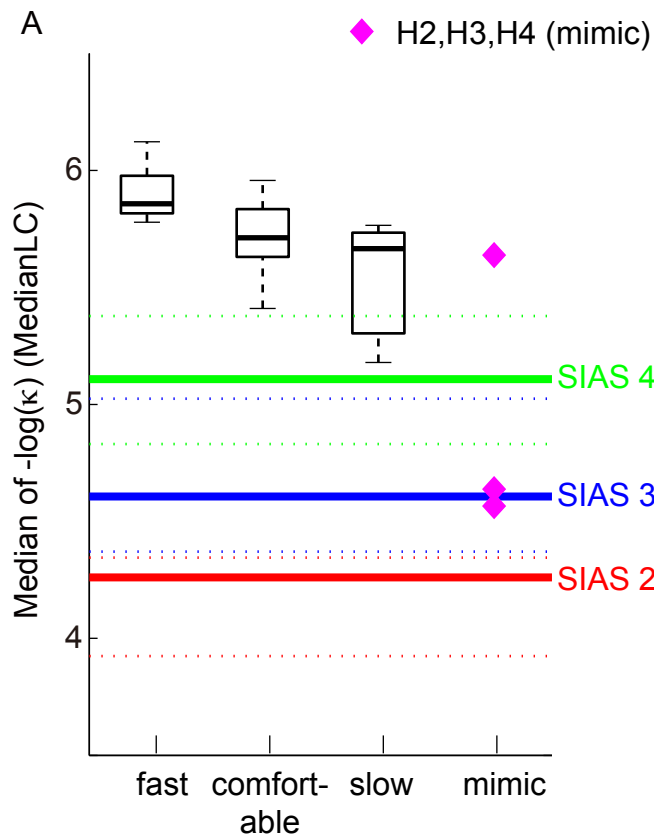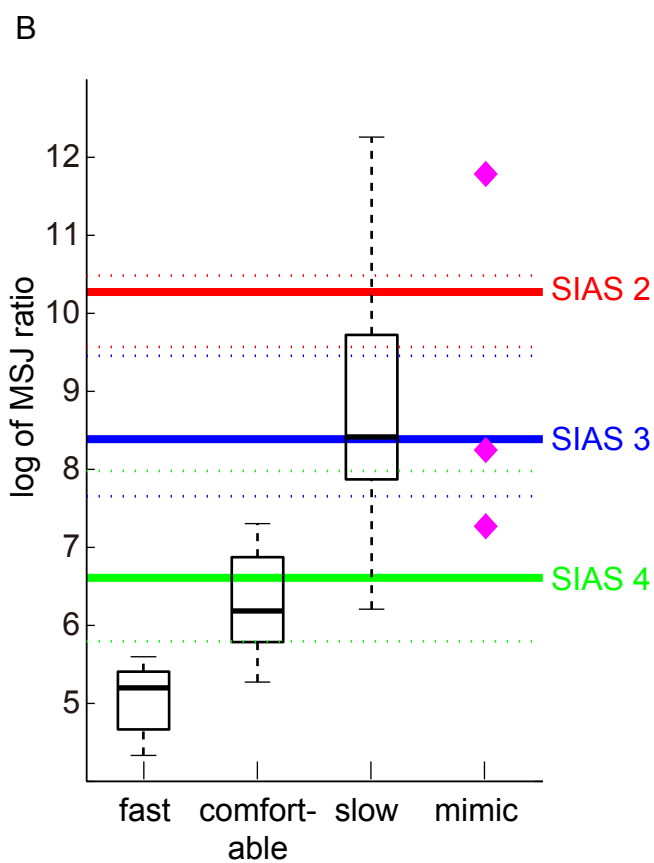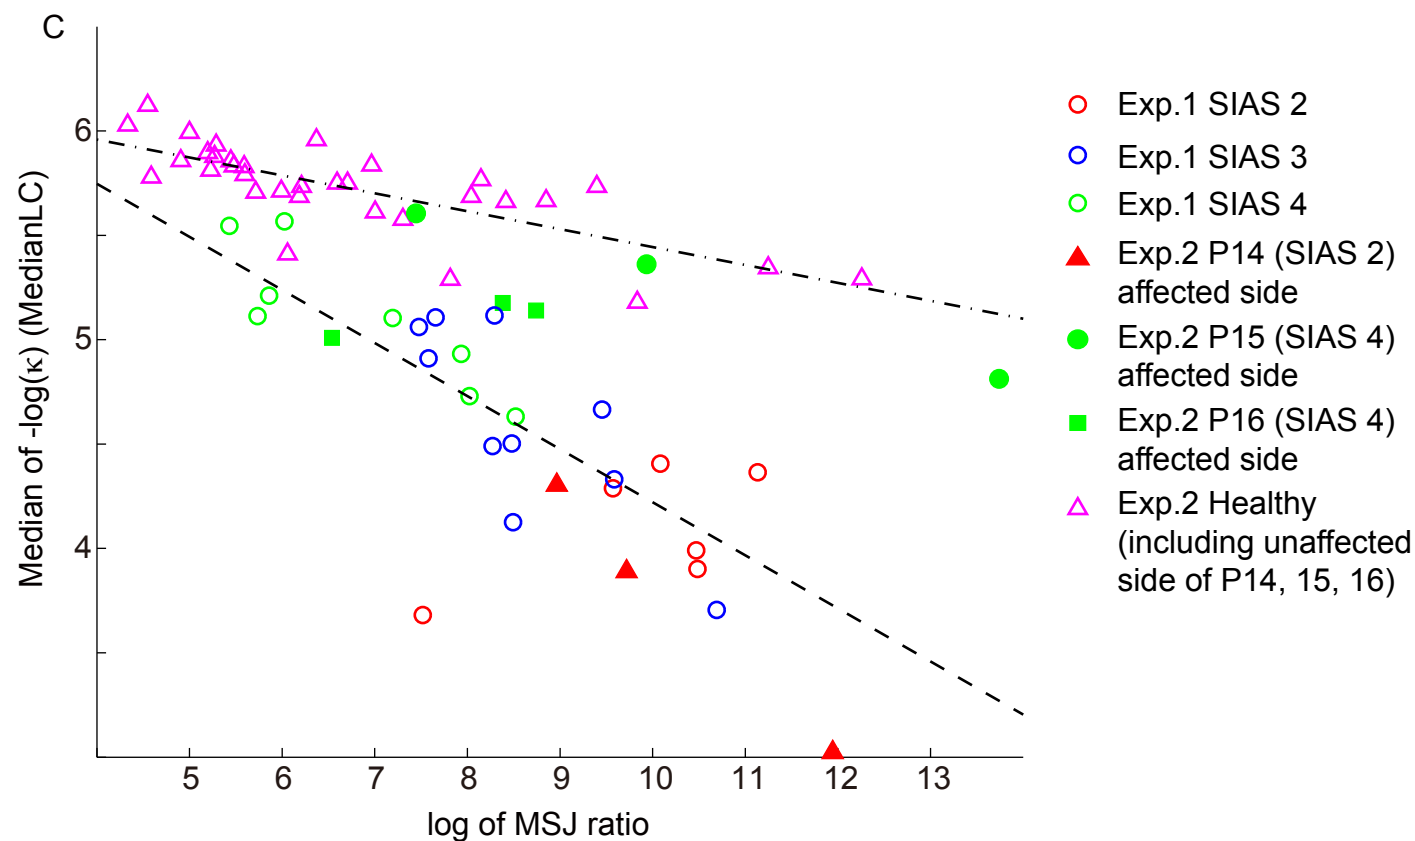

Supplement: MOESM5 [file 9605790]
